# Supplementary material for: Spectral, electrochemical and theoretical studies on the charge transfer complexes of azacyclonol with novel substituted 1,4-benzoquinones possessing tunable electron acceptor properties
Source: Royal Society of Chemistry journal article supplement (doi:10.1039/c2ra20985c), 2012-01-01
Supplement: c2ra20985c.pdf [file c2ra20985c.pdf]

## Supporting information:

### **Spectral, Electrochemical and Theoretical studies on the Charge Transfer Complexes of azacyclonol with novel substituted 1,4-benzoquinones possessing tunable electron acceptor property**

Chellamuthu Balraj, Angupillai Satheshkumar, Karuppusamy Ganesh and Kuppanagounder P.Elango\*

*Department of Chemistry, Gandhigram Rural Institute (Deemed University),  
Gandhigram 624 302, India,*

*\*Email: [drkpelango@rediffmail.com](mailto:drkpelango@rediffmail.com)*

## Table of Contents

|                                                                                                               | <b>Page</b> |
|---------------------------------------------------------------------------------------------------------------|-------------|
| 1. Effect of concentration of the donor and the acceptors .....                                               | 2           |
| 2. Photometric Titration of (AZA-CHL, AZA-MQ <sub>2</sub> , AZA-MQ <sub>3</sub> and AZA-MQ <sub>4</sub> ).... | 3           |
| 3. Electronic spectra of AZA with CHL.....                                                                    | 4           |
| 4. NMR Spectra for the Compounds.....                                                                         | 5-11        |
| 5. Fluorescence spectra of (AZA-CHL, AZA-MQ <sub>2</sub> , AZA-MQ <sub>3</sub> and AZA-MQ <sub>4</sub> )....  | 12-15       |

**Table 1S.** Effect of concentration of the donor and the acceptors on the rate of the interaction at 298 K.

| [D]<br>(10 <sup>-4</sup> M) | [A]<br>(10 <sup>-5</sup> M) | k <sub>1</sub> (10 <sup>-4</sup> ), s <sup>-1</sup> |                     |                     |                     |                     | k <sub>2</sub> s <sup>-1</sup> mol <sup>-1</sup> dm <sup>3</sup> |                     |                     |                     |                     |
|-----------------------------|-----------------------------|-----------------------------------------------------|---------------------|---------------------|---------------------|---------------------|------------------------------------------------------------------|---------------------|---------------------|---------------------|---------------------|
|                             |                             | AZA-CHL                                             | AZA-MQ <sub>1</sub> | AZA-MQ <sub>2</sub> | AZA-MQ <sub>3</sub> | AZA-MQ <sub>4</sub> | AZA-CHL                                                          | AZA-MQ <sub>1</sub> | AZA-MQ <sub>2</sub> | AZA-MQ <sub>3</sub> | AZA-MQ <sub>4</sub> |
| 4                           | 5                           | 16.2                                                | 14.6                | 12.2                | 10.6                | 8.1                 | 4.1                                                              | 3.6                 | 3.1                 | 2.6                 | 2.0                 |
| 6                           | 5                           | 24.1                                                | 21.2                | 17.9                | 15.9                | 12.3                | 4.0                                                              | 3.5                 | 3.0                 | 2.7                 | 2.1                 |
| 8                           | 5                           | 31.8                                                | 28.7                | 23.5                | 20.7                | 15.7                | 4.0                                                              | 3.6                 | 3.0                 | 2.6                 | 2.0                 |
| 10                          | 5                           | 38.5                                                | 35.8                | 29.8                | 26.5                | 20.2                | 3.9                                                              | 3.6                 | 3.0                 | 2.6                 | 2.0                 |
| 10                          | 5                           | 37.6                                                | 35.9                | 29.1                | 26.3                | 20.5                |                                                                  |                     |                     |                     |                     |
| 10                          | 4                           | 38.2                                                | 34.8                | 29.4                | 26.4                | 20.7                |                                                                  |                     |                     |                     |                     |
| 10                          | 3                           | 38.6                                                | 35.2                | 29.6                | 26.9                | 20.4                |                                                                  |                     |                     |                     |                     |
| 10                          | 2                           | 38.1                                                | 35.7                | 29.2                | 26.8                | 19.9                |                                                                  |                     |                     |                     |                     |

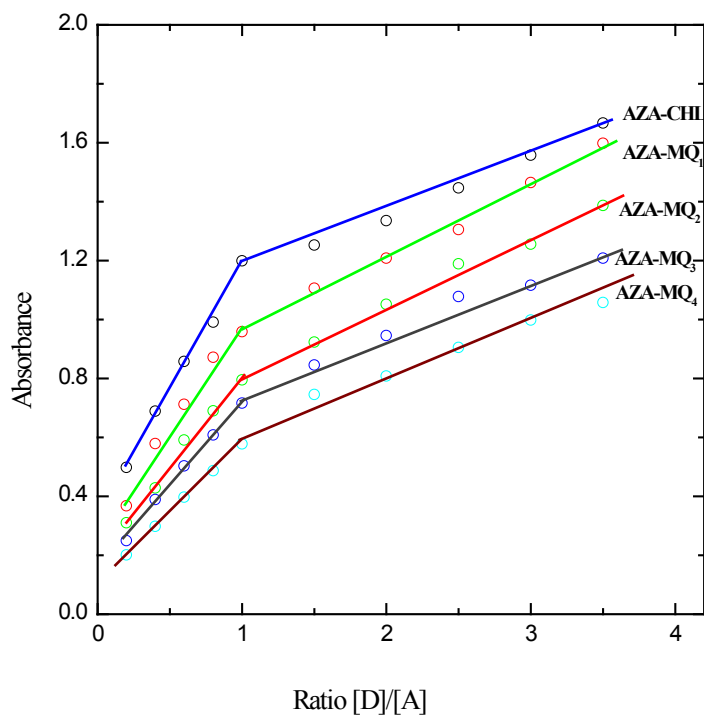

**Fig. 1S.** Photometric titration plots for AZA-CHL, AZA-MQ<sub>1</sub>, AZA-MQ<sub>2</sub>, AZA-MQ<sub>3</sub> and AZA-MQ<sub>4</sub> in 1,2-dichloroethane at 298 K.

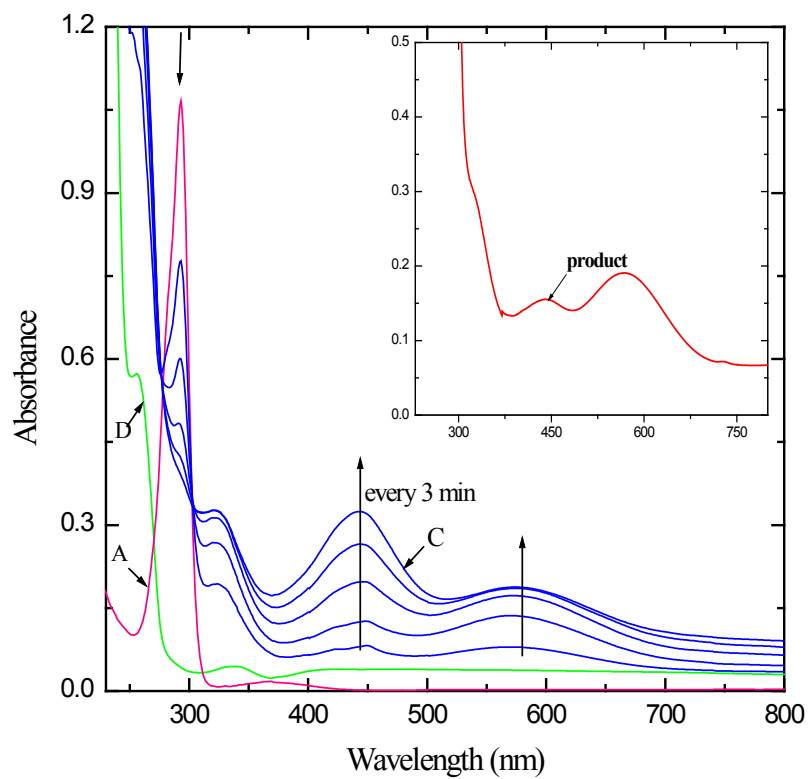

**Fig. 2S.** Electronic spectra of AZA with CHL in 1,2-dichloroethane at 298 K.

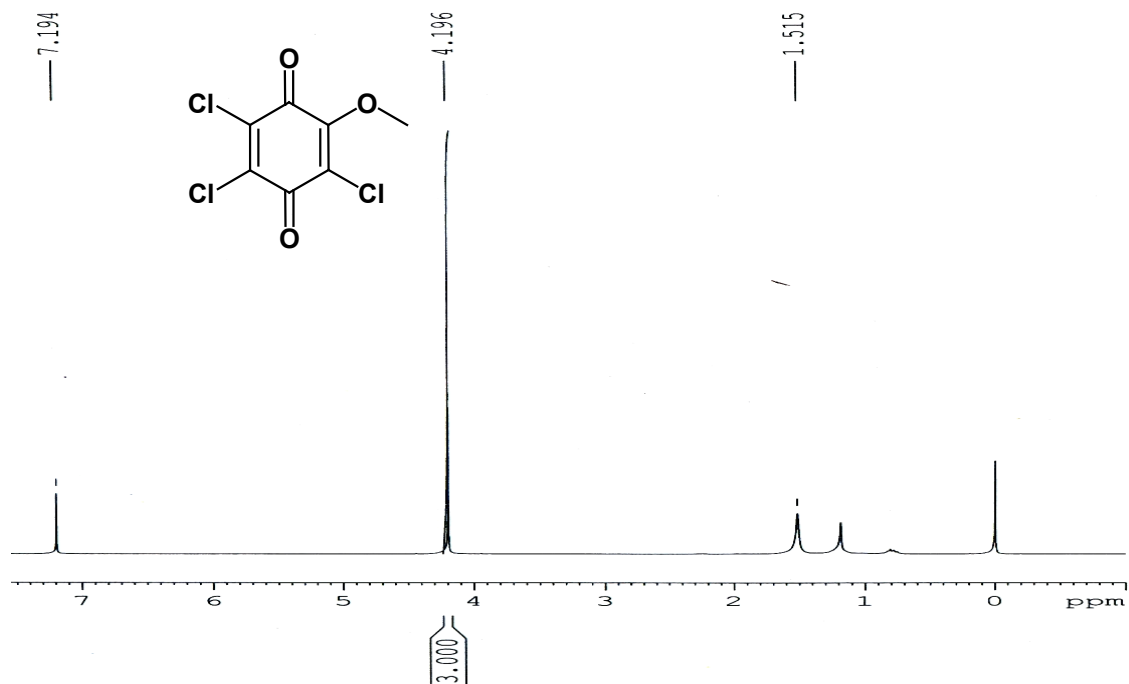

Fig. 3S. <sup>1</sup>H NMR Spectrum of MQ<sub>1</sub>

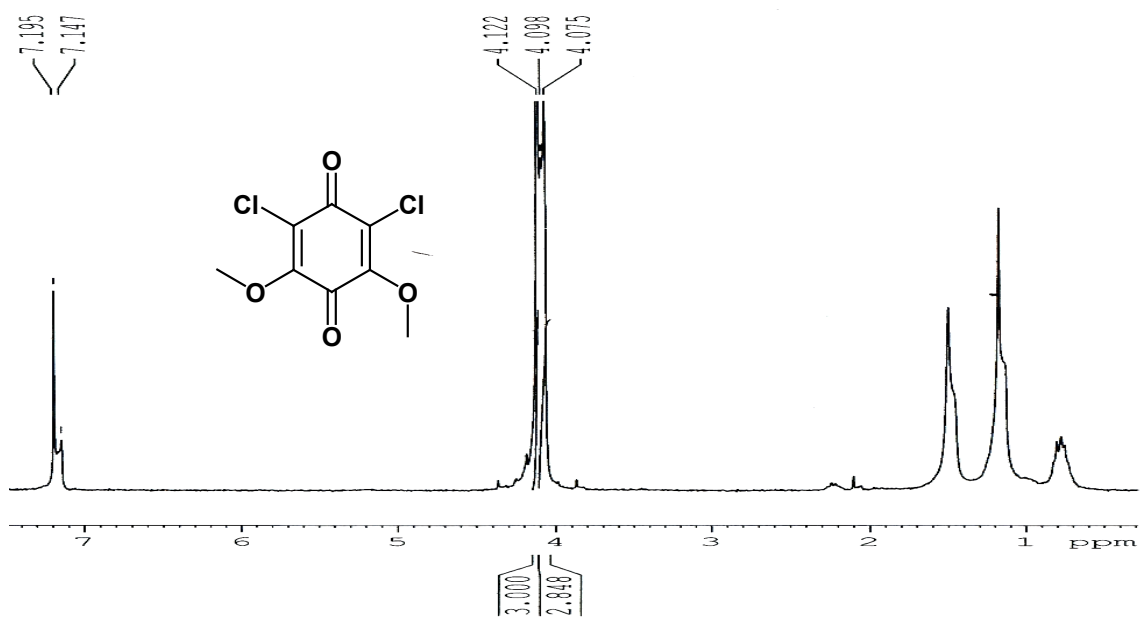

Fig. 4S. <sup>1</sup>H NMR Spectrum of MQ<sub>2</sub>

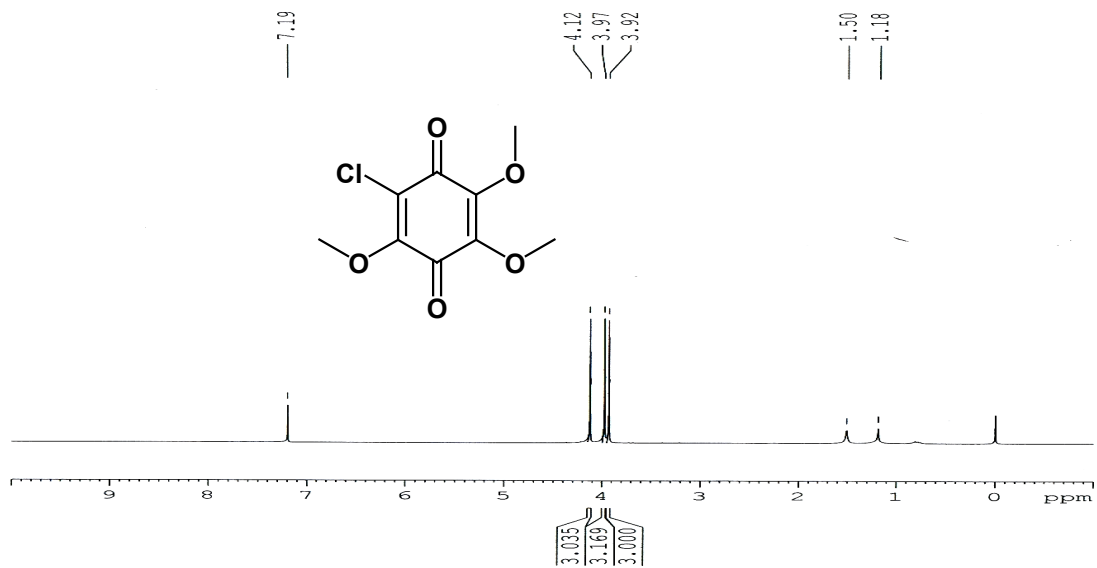

Fig. 5S. <sup>1</sup>H NMR spectrum of MQ<sub>3</sub>

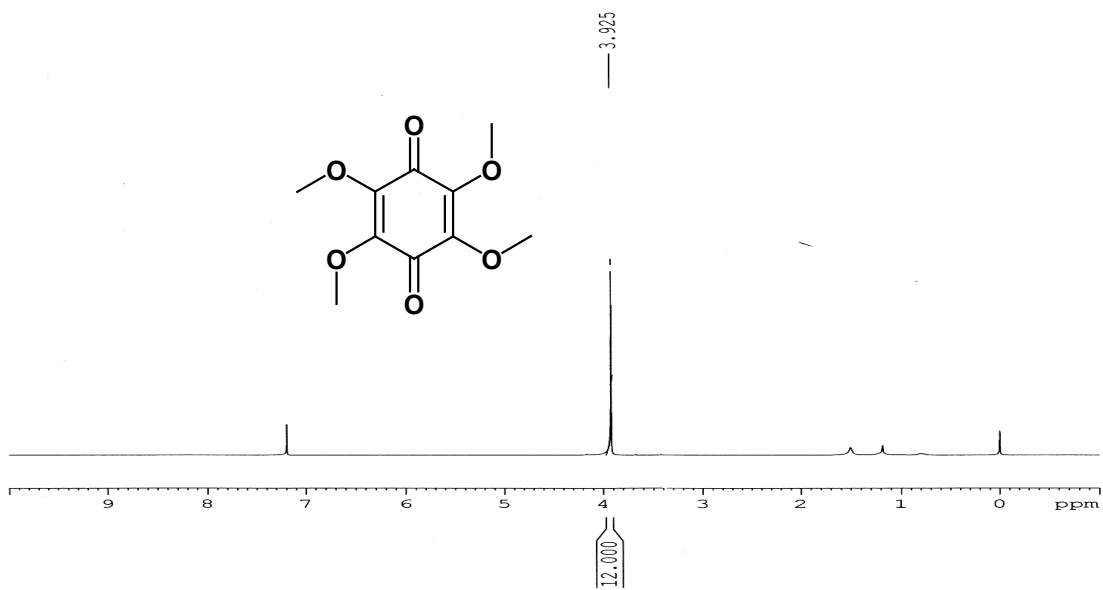

Fig. 6S. <sup>1</sup>H NMR Spectrum of MQ<sub>4</sub>

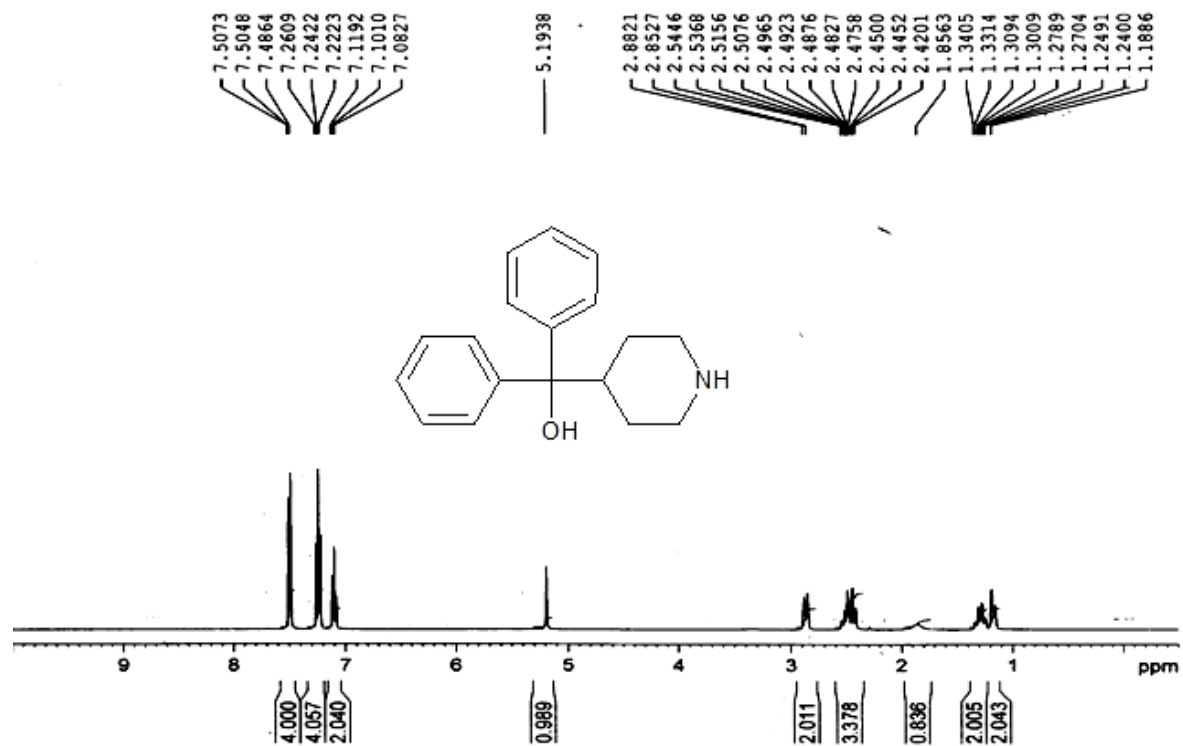

Fig. 7S. <sup>1</sup>H NMR Spectrum of pure AZA

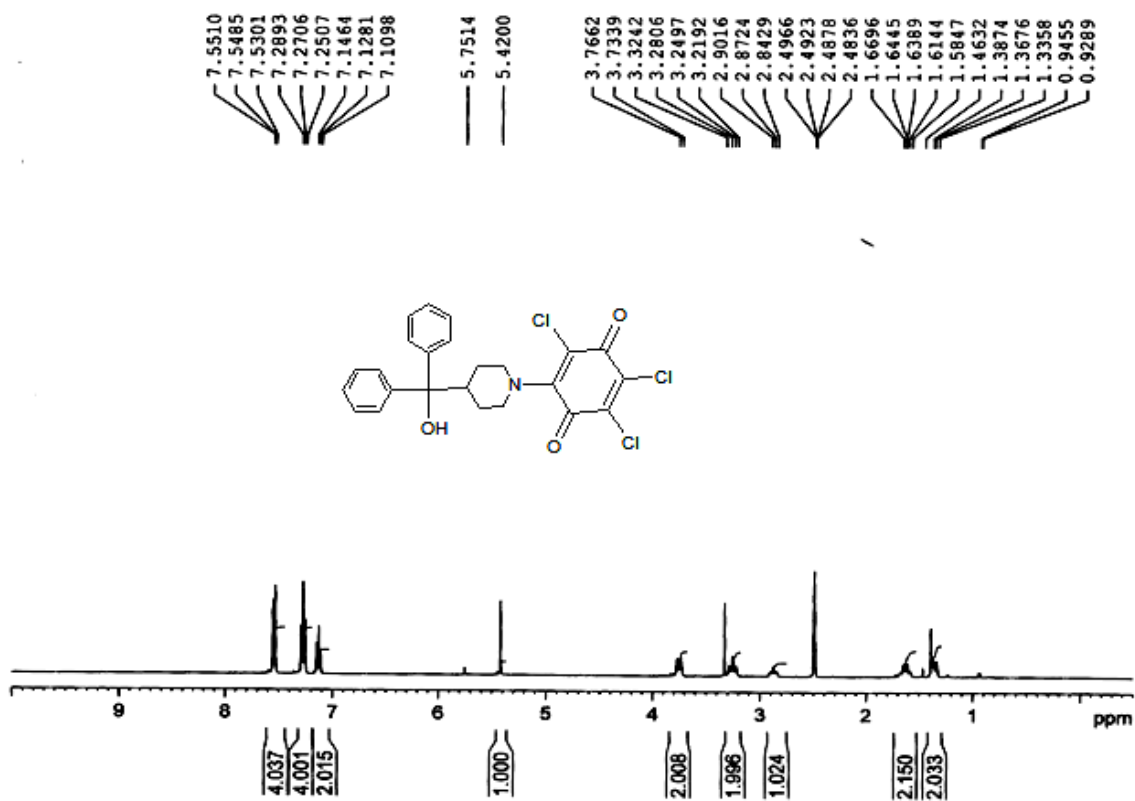

Fig. 8S. <sup>1</sup>H NMR Spectrum of AZA-CHL product



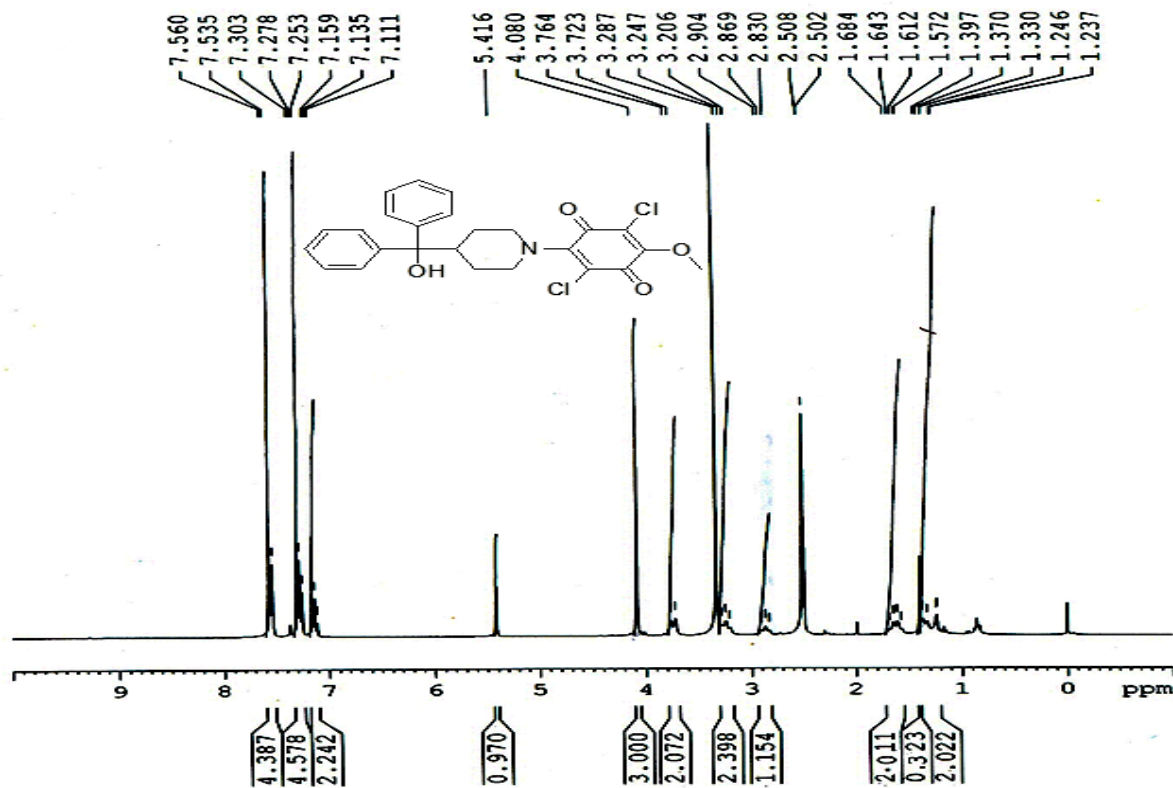

Fig. 9S. <sup>1</sup>H NMR Spectrum of AZA-MQ<sub>1</sub> product

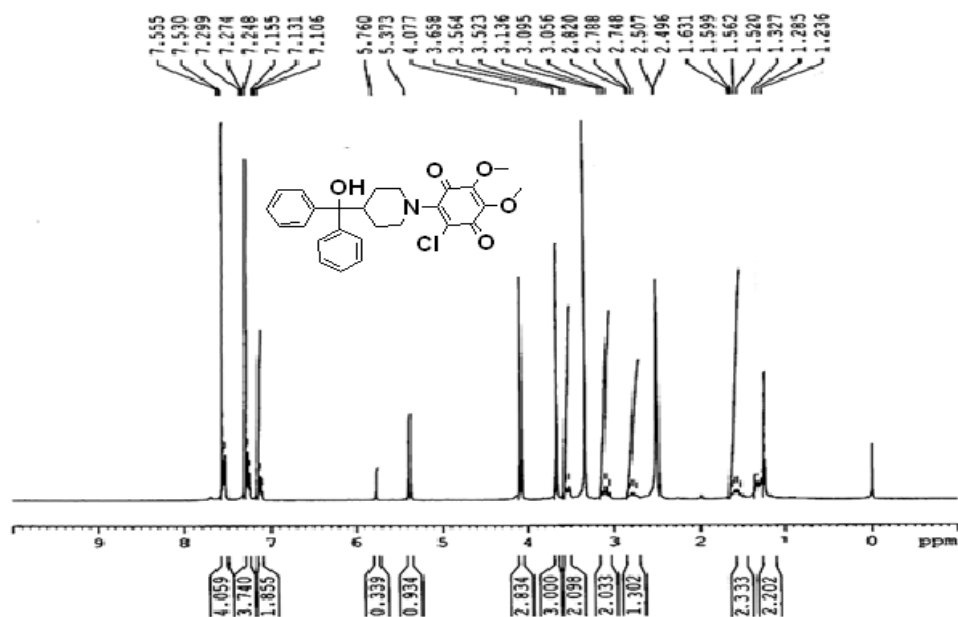

**Fig. 10S.** <sup>1</sup>H NMR Spectrum of AZA-MQ<sub>2</sub> product

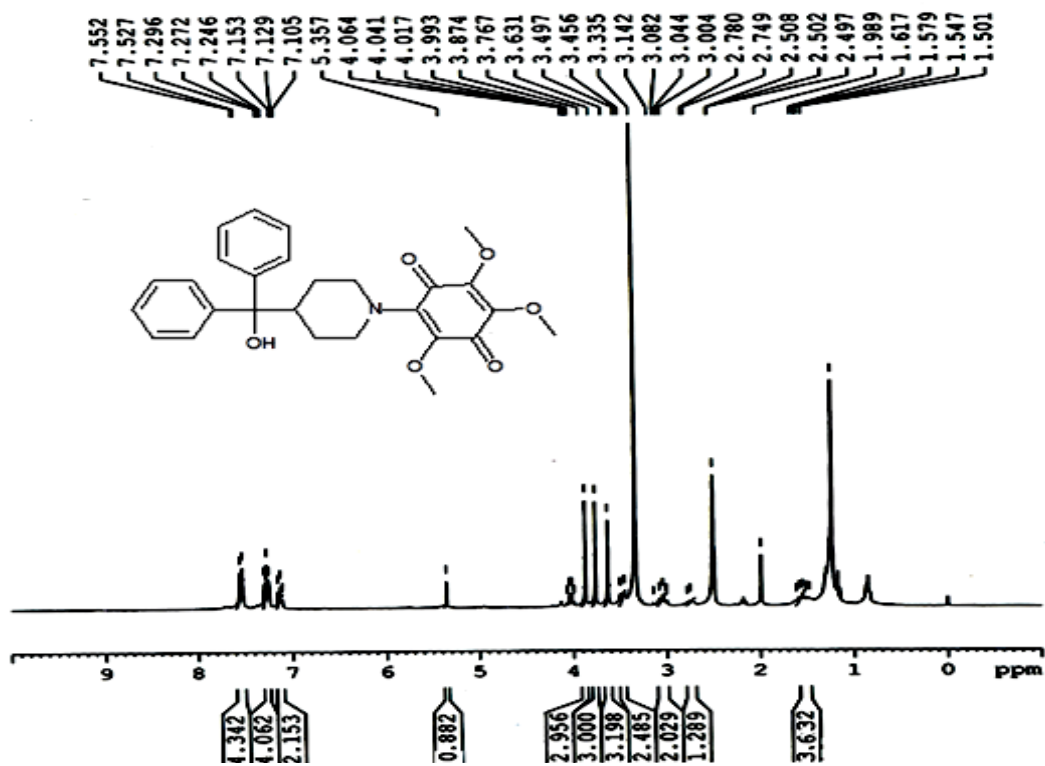

Fig.11S. <sup>1</sup>H NMR Spectrum of AZA-MQ<sub>3</sub> product

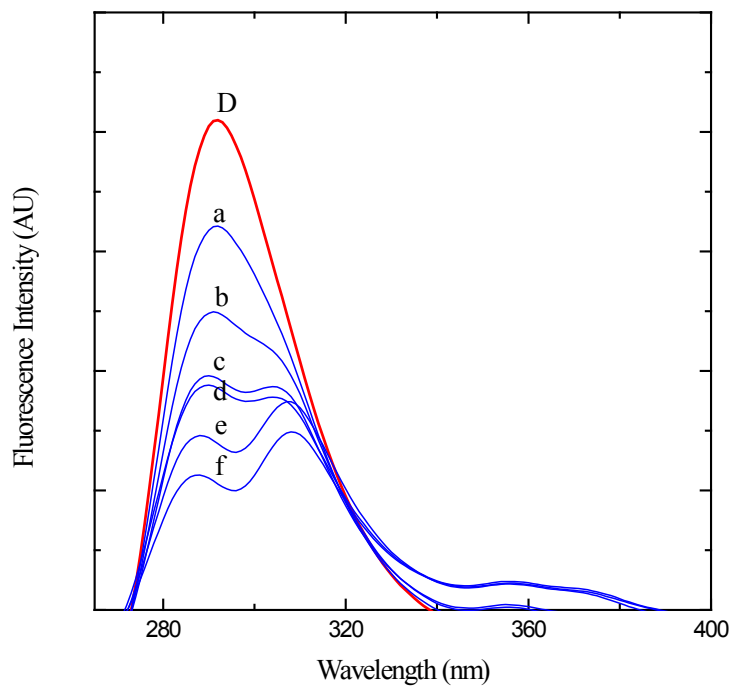

**Fig. 12S.** Fluorescence spectra for AZA-CHL system in 1,2-dichloroethane at fixed concentrations of  $[D] = 8 \times 10^{-4} \text{ M}$  (curve D) and variable concentration of  $[A] (\times 10^{-5}) = \{1 \text{ (curve a), } 2 \text{ (curve b), } 3 \text{ (curve c), } 4 \text{ (curve d), } 5 \text{ (curve e), } 6 \text{ (curve f)}\} \text{ M}$  at 298 K

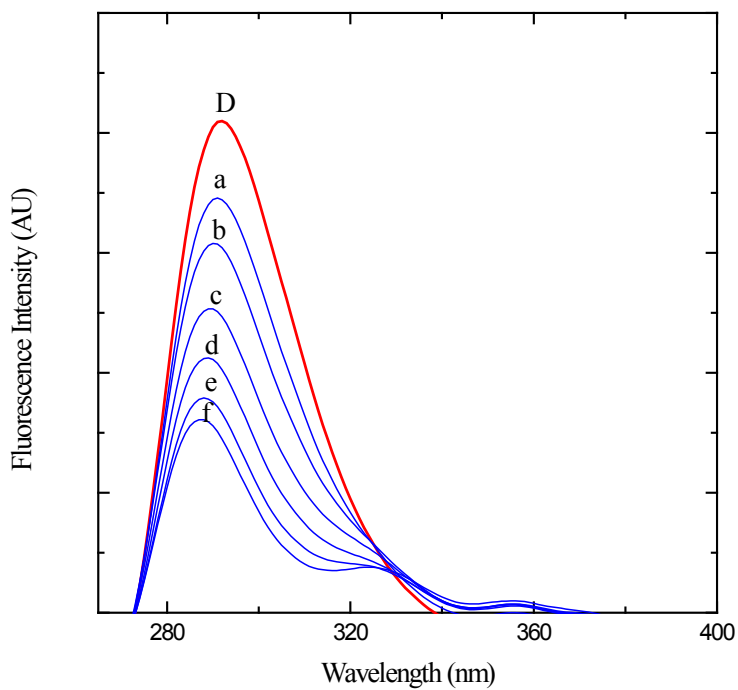

**Fig. 13S.** Fluorescence spectra for AZA-MQ<sub>2</sub> system in 1,2-dichloroethane at fixed concentrations of  $[D] = \{8 \times 10^{-4} \text{ M (curve D)}\}$  and variable concentration of  $[A] (\times 10^{-5}) = \{1 \text{ (curve a), 2 (curve b), 3 (curve c), 4 (curve d), 5 (curve e), 6 (curve f)}\} \text{ M}$  at 298 K

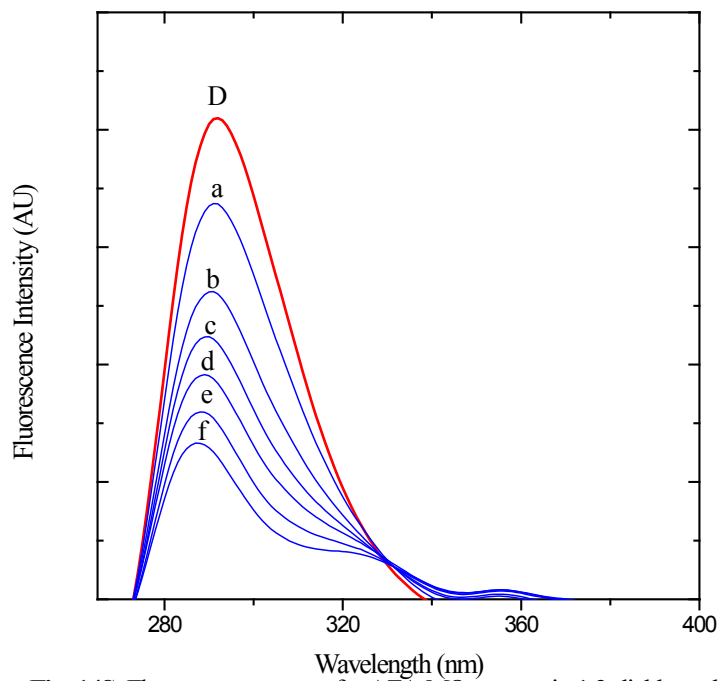

**Fig. 14S.** Fluorescence spectra for AZA-MQ<sub>3</sub> system in 1,2-dichloroethane at fixed concentrations of [D] =  $8 \times 10^{-4}$  M (curve D) and variable concentration of [A] ( $\times 10^{-5}$ ) = {1 (curve a), 2 (curve b), 3 (curve c), 4 (curve d), 5 (curve e), 6 (curve f)} M at 298 K

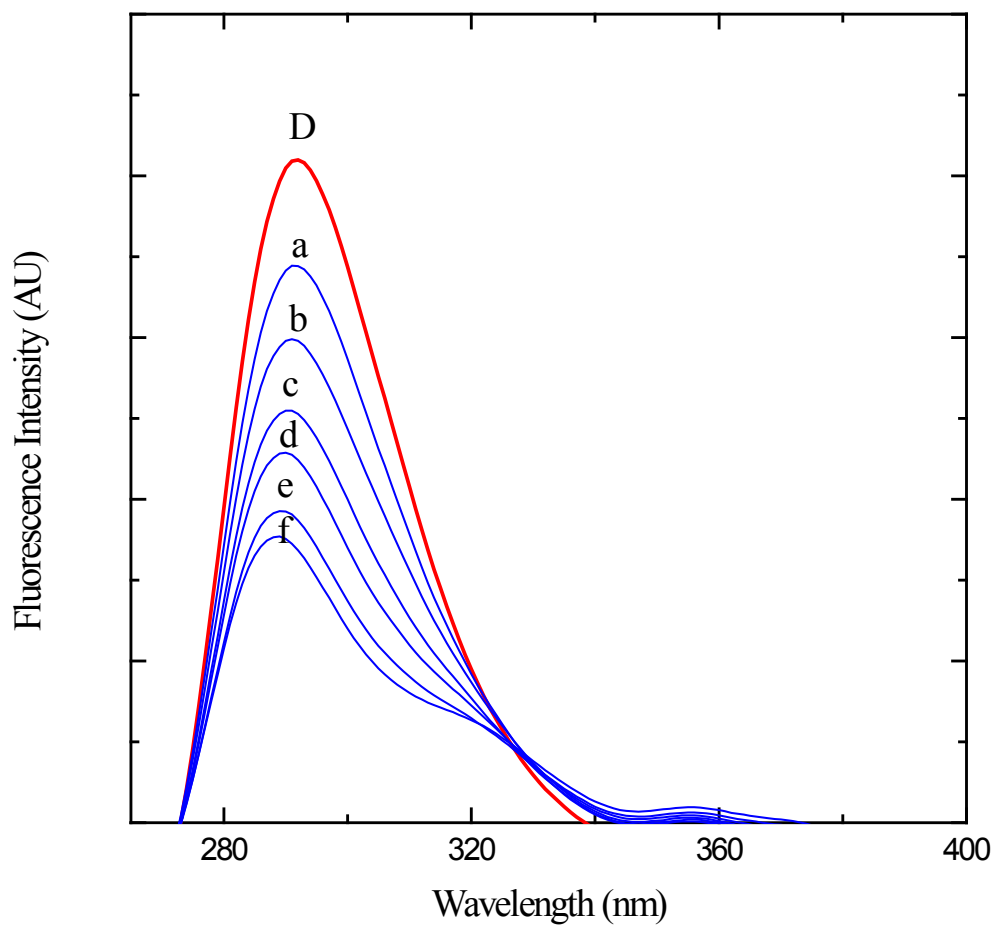

**Fig. 15S.** Fluorescence spectra for AZA-MQ<sub>4</sub> in 1,2-dichloroethane at fixed concentrations of  $[D]=\{8\times 10^{-4}\text{M (curve D)}\}$  and variable concentration of  $[A](\times 10^{-5})=\{1 \text{ (curve a), } 2 \text{ (curve b), } 3 \text{ (curve c), } 4 \text{ (curve d), } 5 \text{ (curve e), } 6 \text{ (curve f)}\}\text{M}$  at 298 K
